# Supplementary material for: The impacts of ocean acidification on marine trace gases and the implications for atmospheric chemistry and climate
Source: PubMed Central journal article supplement (PMC7277135; doi:10.1098/rspa.2019.0769), 2020-05-13
Supplement: rspa20190769supp1.pdf [file rspa20190769supp1.pdf]

## **Supplementary Information for: The impacts of ocean acidification on marine trace gases and the implications for atmospheric chemistry and climate**

Frances E. Hopkins<sup>1</sup>, Parvatha Suntharalingam<sup>2</sup>, Marion Gehlen<sup>3</sup>, Oliver Andrews<sup>4</sup>, Stephen D. Archer<sup>5</sup>, Laurent Bopp<sup>6,7</sup>, Erik Buitenhuis<sup>2</sup>, Isabelle Dadou<sup>8</sup>, Robert Duce<sup>9</sup>, Nadine Goris<sup>10</sup>, Tim Jickells<sup>2</sup>, Martin Johnson<sup>2</sup>, Fiona Keng<sup>11,12</sup>, Cliff S. Law<sup>13,14</sup>, Kitack Lee<sup>15</sup>, Peter S. Liss<sup>2</sup>, Martine Lizotte<sup>16</sup>, Gillian Malin<sup>2</sup>, J. Colin Murrell<sup>2</sup>, Hema Naik<sup>17</sup>, Andrew P. Rees<sup>1</sup>, Jörg Schwinger<sup>10</sup>, Philip Williamson<sup>2</sup>

<sup>1</sup> Plymouth Marine Laboratory, Prospect Place, Plymouth, UK

<sup>2</sup> School of Environmental Sciences, University of East Anglia, Norwich Research Park, Norwich, NR4 7TJ, UK

<sup>3</sup> Laboratoire des Sciences du Climat et de l'Environnement, Institut Pierre Simon Laplace, Orme des Merisiers, Gif-sur-Yvette cedex, France

<sup>4</sup> School of Geographical Sciences, University of Bristol, University Road, Bristol, BS8 1SS

<sup>5</sup> Bigelow Laboratory for Ocean Sciences, Maine, USA

<sup>6</sup> Laboratoire de Météorologie Dynamique, Institut Pierre-Simon Laplace, CNRS-ENS-UPMC-X, Département de Géosciences, Ecole Normale Supérieure, France

<sup>7</sup> Université Ecole Polytechnique, Sorbonne Université, Paris, France.

<sup>8</sup> Laboratoire d'Etudes en Géophysique et Oceanographie Spatiales, University of Toulouse, France

<sup>9</sup> Departments of Oceanography and Atmospheric Sciences, Texas A&M University, College Station, Texas, USA

<sup>10</sup> NORCE Climate, Bjerknes Centre for Climate Research, Bergen Norway

<sup>11</sup> Institute of Ocean and Earth Sciences (IOES), University of Malaya, Kuala Lumpur, Malaysia

<sup>12</sup> Institute of Graduate Studies (IGS), University of Malaya, Kuala Lumpur, Malaysia

<sup>13</sup> National Institute of Water and Atmospheric Research, Wellington, New Zealand

<sup>14</sup> Department of Chemistry, University of Otago, Dunedin, New Zealand

<sup>15</sup> Division of Environmental Science and Engineering, Pohang University of Science and Technology, Pohang, South Korea.

<sup>16</sup> Department of Biology, Université Laval, Quebec City, Canada

<sup>17</sup> CSIR-National Institute of Oceanography, Dona Paula 403004, Goa, India

Author for correspondence: Frances E. Hopkins email: [fhop@pml.ac.uk](mailto:fhop@pml.ac.uk)

**Table S1: Response of DMS and/or DMSP to high CO<sub>2</sub> in unialgal culture experiments.**

| Study                     | Species               | Strain                               | Response to high CO <sub>2</sub>                                   |
|---------------------------|-----------------------|--------------------------------------|--------------------------------------------------------------------|
| Avgoustidi et al. 2012    | <i>E. huxleyi</i>     | CCMP1516 (non-calc)                  | [DMS] ↓                                                            |
| Spielmeyer & Pohnert 2012 | <i>T. pseudonana</i>  | CCMP1335                             | [DMSP] +T ↓                                                        |
|                           | <i>P. tricornutum</i> | CCMP2561                             | [DMSP] +CO <sub>2</sub> ↓                                          |
|                           | <i>E. huxleyi</i>     | RCC1242 (non-calc)<br>RCC1731 (calc) | [DMSP] +T ↑<br>[DMSP] +CO <sub>2</sub> ↑                           |
| Arnold et al. 2013        | <i>E. huxleyi</i>     | CCMP373 (non-calc)                   | [DMS] +CO <sub>2</sub> ↓<br>[DMS] +T ↑<br>[DMS]+TCO <sub>2</sub> ↑ |
| Webb et al. 2015          | <i>E. huxleyi</i>     | RCC1229 (calc)                       | [DMS] [DMSP] ↔<br>DMSP/cell vol. ↓                                 |
| Olson et al. 2017         | <i>E. huxleyi</i>     | CCMP374 (non-calc)                   | DMSP/cell vol. ↔                                                   |
|                           |                       | CCMP 2668 (calc)                     | DMSP/cell vol. ↓                                                   |

non-calc = non calcifying, calc = calcifying

1 **Table S2. Summary of the results of nine mesocosm studies that have reported the response of DMS to high CO<sub>2</sub>**

| Study                  | Location       | Month (Season)   | pCO <sub>2</sub> levels | DMS response to high CO <sub>2</sub> (change from 350µatm) (%) | Integrated DMS (350-750µatm) (nmol L <sup>-1</sup> ) | Calculation Basis                                      |
|------------------------|----------------|------------------|-------------------------|----------------------------------------------------------------|------------------------------------------------------|--------------------------------------------------------|
| Avgoustidi et al. 2012 | Bergen, Norway | May (Spring)     | 300:700                 | -38%                                                           | 16.7: 10.4                                           | 2 treatment (2 replicates)                             |
| Vogt et al. 2008       | Bergen, Norway | May (Spring)     | 300:690                 | 26%                                                            | 9.3 - 11.7                                           | 2 treatments (3 replicates)                            |
| Hopkins et al. 2010    | Bergen, Norway | May (Spring)     | 320:760                 | -40%                                                           | 8.8 - 5.3                                            | 2 treatments (3 replicates)                            |
| Webb et al. 2015       | Bergen, Norway | May (Spring)     | 350 - 750               | -22%                                                           | 1.4 - 1.1                                            | Linear fit to pCO <sub>2</sub> vs integrated DMS (n=9) |
| Kim et al. 2010        | Korea          | Not reported     | 360 - 730               | 18%                                                            | 3.3 - 5.2                                            | 2 treatments (3 replicates)                            |
| Park et al. 2014       | Korea          | May (Spring)     | 350 - 750               | -42%                                                           | 27.4 - 15.8                                          | Linear fit to pCO <sub>2</sub> vs integrated DMS (n=6) |
| Archer et al. 2013     | Svalbard       | June (Summer)    | 350 - 750               | -13%                                                           | 7.5 - 8.7                                            | Linear fit to pCO <sub>2</sub> vs integrated DMS (n=9) |
| Webb et al. 2016       | Baltic Sea     | June (Summer)    | 350 - 750               | -9%                                                            | 4.3 - 3.9                                            | Linear fit to pCO <sub>2</sub> vs integrated DMS (n=9) |
| Archer et al. 2018     | Canary Islands | October (Autumn) | 400 - 800               | -20%                                                           | 5.5 - 4.5                                            | Linear fit to pCO <sub>2</sub> vs integrated DMS (n=9) |

**Table S3: Summary of mesocosm studies investigating the effect of increased pCO<sub>2</sub> on the halocarbon emissions in three different locations.**

| <b>Study</b>                                                      | <b>Hopkins et al. 2010</b>          | <b>Hopkins et al. 2013</b>                                     | <b>Webb et al. 2016</b>           |
|-------------------------------------------------------------------|-------------------------------------|----------------------------------------------------------------|-----------------------------------|
| <b>Location</b>                                                   | Bergen, Norway                      | Kongsfjorden, Svalbard                                         | Tvärminne Storfjärden, Baltic Sea |
| <b>Character</b>                                                  | Temperate coastal                   | Polar                                                          | Brackish                          |
| <b>pCO<sub>2</sub> levels (µatm)</b>                              | 380, 750                            | 185 - 1420                                                     | 600 - 1650                        |
| <b>Date</b>                                                       | May 2006                            | June/July 2010                                                 | June 2012                         |
| <b>Dominant biological community</b>                              | Picoeukaryotes                      | Nanoeukaryotes<br>Picoeukaryotes                               | Chlorophytes<br>Cryptophytes      |
| <b>General biological response to high pCO<sub>2</sub> levels</b> | Reduced under high pCO <sub>2</sub> | Increased under high pCO <sub>2</sub> upon nutrient enrichment | Unclear                           |
| <b>Bromocarbon response</b>                                       | Insignificant                       | No clear effect                                                | Insignificant                     |
| <b>Iodocarbon response</b>                                        | Unclear                             | CH <sub>3</sub> reduced with increasing pCO <sub>2</sub>       | Insignificant                     |
